# Supplementary material
Source: MDPI journal article supplement (https://www.mdpi.com/2077-0472/12/6/879)
Supplement: s1 [file s1]

**Supplementary Table S1:** Assignment of GHG emission values (GHG-intensity) from Lal (2004) [16] (left four columns) to related chemical classes (fifth column) and active ingredients (AI, sixth column) of herbicides used in Austria (sales data from AGES). Only values in bold print were finally assigned.

| AI from Lal (2004) [16]               | Chemical class               | GHG intensity (kg CO <sub>2</sub> -eq emissions kg <sup>-1</sup> AI [16]) | Calc. Mean emiss chem class <sup>1</sup> | Related chemical class in this study    | Related AIs of these chemical classes in this study                                                                                                                                                                                                                                           |
|---------------------------------------|------------------------------|---------------------------------------------------------------------------|------------------------------------------|-----------------------------------------|-----------------------------------------------------------------------------------------------------------------------------------------------------------------------------------------------------------------------------------------------------------------------------------------------|
| Alachlor<br>Metolachlor<br>Propachlor | Chloracetamide               | 5.60<br>5.50<br>5.80                                                      | <b>5.63</b>                              | Amide & anilide                         | Dimethachlor, s-metalo-chlor, metazachlor, pethoxamid, dimethenamid-p, dimethenamid, Befluto-butamid, napropamide, isoxaben, penoxsulam, propyzamide, pyroxsul-lam, diflufenican, florasu-lam, flufenacet, metosu-lam                                                                         |
| Butylate<br>EPTC                      | Thiocarbamate                | 2.80<br>3.20                                                              | <b>3.00</b>                              | Carbamate & bicarbamate, thiocarbamate  | Desmedipham, phen-medipham, asulam, car-betamide, prosulofcarb, tri-allate                                                                                                                                                                                                                    |
| Trifluralin<br>Atrazine<br>Cyanazine  | Dinitrosaniline<br>Triazine  | <b>3.00</b><br>3.80<br>4.00                                               | <b>3.90</b>                              | Dinitroaniline<br>Triazine & triazinone | Pendimethalin<br>Terbuthylazin, metam-iron, metribuzin                                                                                                                                                                                                                                        |
| Chlorosulfuron                        | Sufonylurea                  | <b>7.30</b>                                                               |                                          | Sulfonylurea                            | Amidosulfuron, flazasul-furon, flupyr-sulfuron-methyl, formasulfuron, iodosulfuron-methyl-so-dium, mesosulfuron-me-thyl, metsulfuron-methyl, nicosulfuron, prosulfu-ron, rimsulfuron, sul-fosulfuron, tritosulfuron, tribenuron-methyl, tri-flusulfuron, thifensulfu-ron-methyl, triasulfuron |
| Linuron                               | Urea                         | <b>5.80</b>                                                               |                                          | Urea                                    | Linuron, chlortoluron, isoproturon, metobro-muron                                                                                                                                                                                                                                             |
| Chlorosulfuron                        | Sulfonylurea                 | <b>7.30</b>                                                               |                                          | Uracil                                  | Lenacil                                                                                                                                                                                                                                                                                       |
| Glyphosate                            | Phosphonoglycine             | <b>9.10</b>                                                               |                                          | Organophosphate                         | Glyphosate, glufosinate-ammonium                                                                                                                                                                                                                                                              |
| 2,4-D                                 | Alkylchlorophenoxy           | <b>1.70</b>                                                               |                                          | Phenoxy                                 | 2,4-D                                                                                                                                                                                                                                                                                         |
| MCPA                                  | Aryloxyalkanoic acid phenoxy | <b>2.60</b>                                                               |                                          | Phenoxy                                 | MCPA                                                                                                                                                                                                                                                                                          |
|                                       |                              |                                                                           | <b>2.15</b>                              | Phenoxy except 2,4-D and MCPA           | 2,4-D, dichlorprop-p, MCPB, mecoprop, mecoprop-p                                                                                                                                                                                                                                              |

|                      |                          |              |                                                                                                                                                                                                                                                                                              |                                                                                                                                                                                                                                                                                                                                                                                                                                                                                                                                    |
|----------------------|--------------------------|--------------|----------------------------------------------------------------------------------------------------------------------------------------------------------------------------------------------------------------------------------------------------------------------------------------------|------------------------------------------------------------------------------------------------------------------------------------------------------------------------------------------------------------------------------------------------------------------------------------------------------------------------------------------------------------------------------------------------------------------------------------------------------------------------------------------------------------------------------------|
| Fluazifop-butyl      | Aryloxyphenoxypropionate | <b>10.40</b> | Aryloxyphenoxypropionate                                                                                                                                                                                                                                                                     | Fenoxaprop-p-ethyl, fluazifop-p-butyl, haloxyfop-p, propaquizafop, quizalofop-p-ethyl, quizalofop-p-tefuryl                                                                                                                                                                                                                                                                                                                                                                                                                        |
| Bentazon             | Benzothiazinone          | <b>8.70</b>  | Benzothiazinone/thiadiazine                                                                                                                                                                                                                                                                  | Bentazon                                                                                                                                                                                                                                                                                                                                                                                                                                                                                                                           |
| Dicamba              | Benzothiazinone          | <b>5.90</b>  | Benzoic acid                                                                                                                                                                                                                                                                                 | Dicamba                                                                                                                                                                                                                                                                                                                                                                                                                                                                                                                            |
| Diquat               | Bipyridylum              | <b>8.00</b>  | Bipyridylum                                                                                                                                                                                                                                                                                  | Diquat                                                                                                                                                                                                                                                                                                                                                                                                                                                                                                                             |
|                      |                          |              |                                                                                                                                                                                                                                                                                              | Ethofumesate, clethodum, cycloxydium, tepraloxydium, flumioxazin, pyridate, aclonifen, bifenox, oxyfluorfen, imazamox, iron sulphate, isoxylutole, topramezone, bromoxynil, heptanoate, ioxynil, pinoxaden, pyraflufen-ethyl, chlordazon, flurtamone, picolinafen, clopyralid-monoethanolamin-salt, picloram, halauxifen-methyl, aminopyralid, fluroxypyr, triclopyr, quinmerac, carfentrazone-ethyl, propoxycarbazone-sodium, quinclamate, cindion-ethyl, thienicarbazone-methyl, mesotrione, slucotrione, tembotrione, clomazone |
| Herbicide mean value |                          | <b>6.30</b>  | Benzofurane, cyclohexandione, dicarboximide, diazine, diphenyl ether, imidazolinone, inorganic herbicides, isoxazole, nitrile, phenylpyrazole, pyridazinone, pyridincarboxamide, pyridinecarboxylic acid, pyridine acetic acid, quinoline, triazolinone, triazolone, triketone, unclassified |                                                                                                                                                                                                                                                                                                                                                                                                                                                                                                                                    |

**Supplementary Table S2:** Assignment of GHG emission values (GHG-intensity) from Lal (2004) [16] (left four columns) to related chemical classes of insecticides used in 2017 in Austria for crops of analysis (use statistics 2017, AGES 2020) [34] (fifth column). Only values in bold print were finally assigned.

| AIs from Lal (2004) [16] | Chemical class      | GHG-intensity (kg CO <sub>2</sub> -eq emissions kg-AI <sup>-1</sup> ) [16] | Calculated mean emiss. Chemical class <sup>-1</sup> | Related chemical class of AGES use statistics data 2017[34]                                     |
|--------------------------|---------------------|----------------------------------------------------------------------------|-----------------------------------------------------|-------------------------------------------------------------------------------------------------|
| Methyl parathion         | Organophosphosphate | 3.20                                                                       | <b>3.70</b>                                         | Organophosphosphate                                                                             |
| Phorate                  |                     | 4.20                                                                       |                                                     |                                                                                                 |
| Malathion                |                     | 4.60                                                                       |                                                     |                                                                                                 |
| Parathion                |                     | 2.80                                                                       |                                                     |                                                                                                 |
| Carbofuran               | Carbamate           | 9.10                                                                       | <b>6.10</b>                                         | Carbamates & oxicarbamates                                                                      |
| Carbayl                  |                     | 3.10                                                                       |                                                     |                                                                                                 |
| Cypermethrin             | Pyrethroid          | <b>11.70</b>                                                               |                                                     |                                                                                                 |
| Insecticide mean value   |                     | <b>5.10</b>                                                                |                                                     | Pyrethroids<br>Neonicotinoids, insecticides of microbiological or vegetal origin, molluscicides |

**Supplementary Table S3:** Assignment of GHG emission values (GHG-intensity) from Lal (2004) [16] (left four columns) to chemical classes of fungicides used in 2017 in Austria for crops of analysis (use statistics 2017, AGES 2020) [34] (fifth column). Only values in bold print were finally assigned.

| AIs from Lal (2004) [16] | Chemical class | GHG-intensity (kg CO <sub>2</sub> -eq emissions kg-AI <sup>-1</sup> ) [16] | Calculated mean emiss. Chemical class <sup>-1</sup> | Related chemical class of AGES use statistics data 2017[34]                                                                |
|--------------------------|----------------|----------------------------------------------------------------------------|-----------------------------------------------------|----------------------------------------------------------------------------------------------------------------------------|
| Ferbam parathion         | Carbamate      | 1.20                                                                       | <b>1.60</b>                                         | Carbamate & dithiocarbamate                                                                                                |
| Maneb                    |                | 2.00                                                                       |                                                     |                                                                                                                            |
| Benomyl                  | Benzimidazole  | <b>8.00</b>                                                                |                                                     | Benzimidazole                                                                                                              |
|                          |                |                                                                            |                                                     | Imidazole, triazole, morpholine, other organic- and inorganic fungicides, fungicides of microbiological and vegetal origin |
| Fungicides mean value    |                | <b>3.90</b>                                                                |                                                     |                                                                                                                            |

**Supplementary Table S4:** Chemical classes of herbicides used in 2017 in Austria for crops of analysis (usage statistics 2017, AGES 2020) [34] (left) and assigned GHG emission values (GHG-intensity) from Lal (2004) [16].

| Chemical class in AGES use statistics data 2017 [34] | Assigned GHG-intensity to chemical class (kg CO <sub>2</sub> -eq emissions kg <sup>-1</sup> ) |
|------------------------------------------------------|-----------------------------------------------------------------------------------------------|
| Amides & anilides                                    | 5.48                                                                                          |
| Carbamates & biscalbamates                           | 3.00                                                                                          |
| Dinitroanilines                                      | 3.00                                                                                          |
| Urea-, uracil-, sulphonylureas                       | 7.00                                                                                          |
| Organophates                                         | 9.10                                                                                          |
| Phenoxy-phytohormones                                | 2.15                                                                                          |
| Triozines & triazinones                              | 3.90                                                                                          |
| Other organic herbicides                             | 7.04                                                                                          |
